# Supplementary material for: Illustrating the surface chemistry of nitrogen oxides (NO x ) adsorbed on rutile TiO 2 (110) with the aid of STM and AIMD simulation
Source: Royal Society of Chemistry journal article supplement (doi:10.1039/d4cy01310g), 2025-01-01
Supplement: d4cy01310g1.pdf [file d4cy01310g1.pdf]

# Illustrating the Surface chemistry of Nitrogen Oxides ( $\text{NO}_x$ ) adsorbed on Rutile $\text{TiO}_2$ (110) with the aid of STM and AIMD simulation.

S. Muthukrishnan<sup>1,2</sup>, R. Vidya<sup>1,2</sup>, \*, and Anja Olafsen Sjøstad<sup>3</sup>

## Supplementary materials

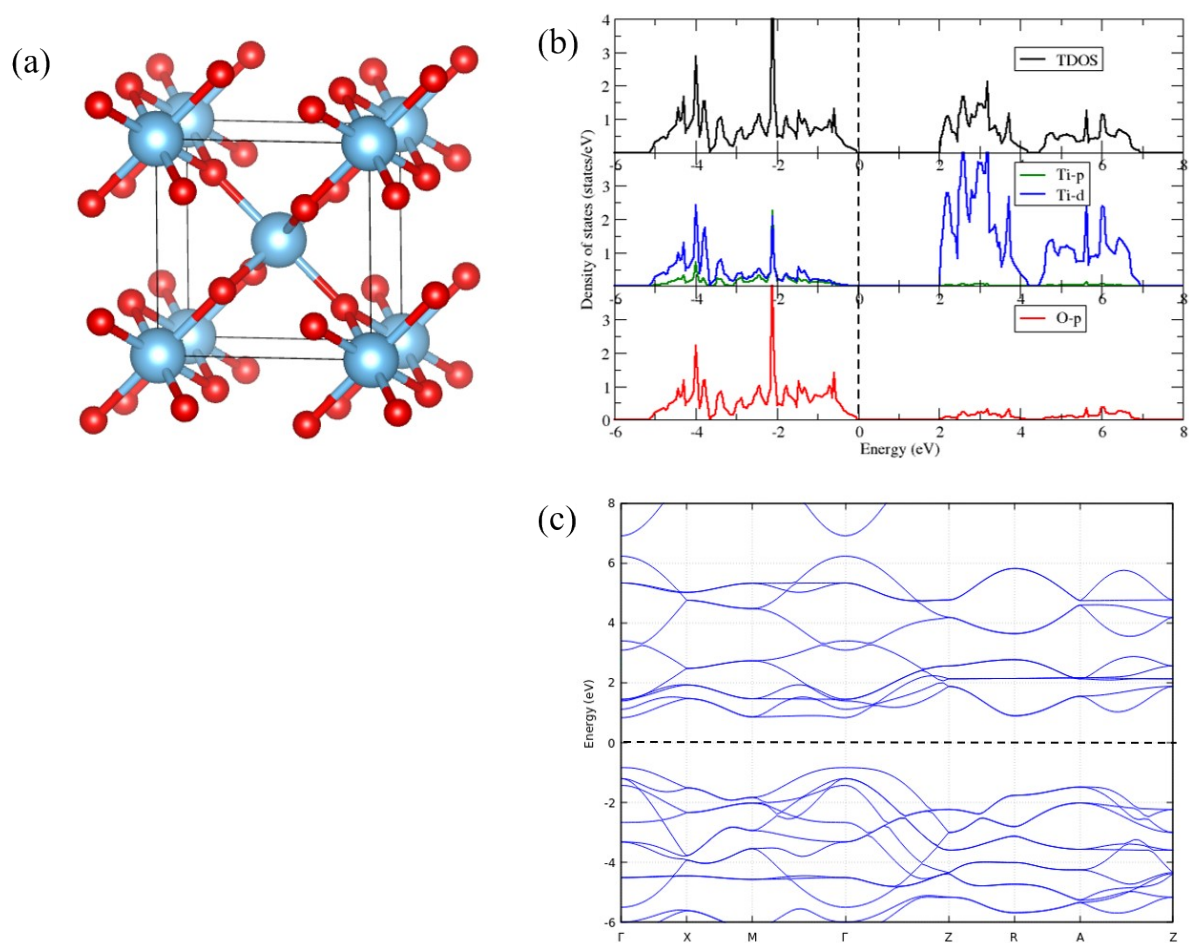

Figure S1 (a) Unit cell structure, (b) The projected density of states, and (c) electronic band structure plots for  $\text{TiO}_2$  Rutile

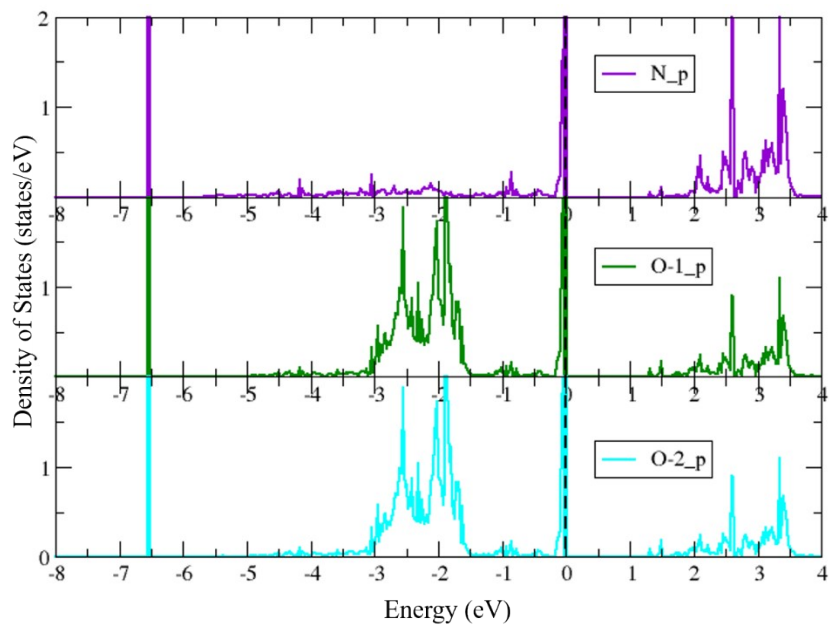

Figure S2, Projected Density of States for  $\text{NO}_2$  molecule adsorbed on  $\text{Ti}_{5c}$  site with O down configuration on  $\text{TiO}_2$  Rutile (110) surface.

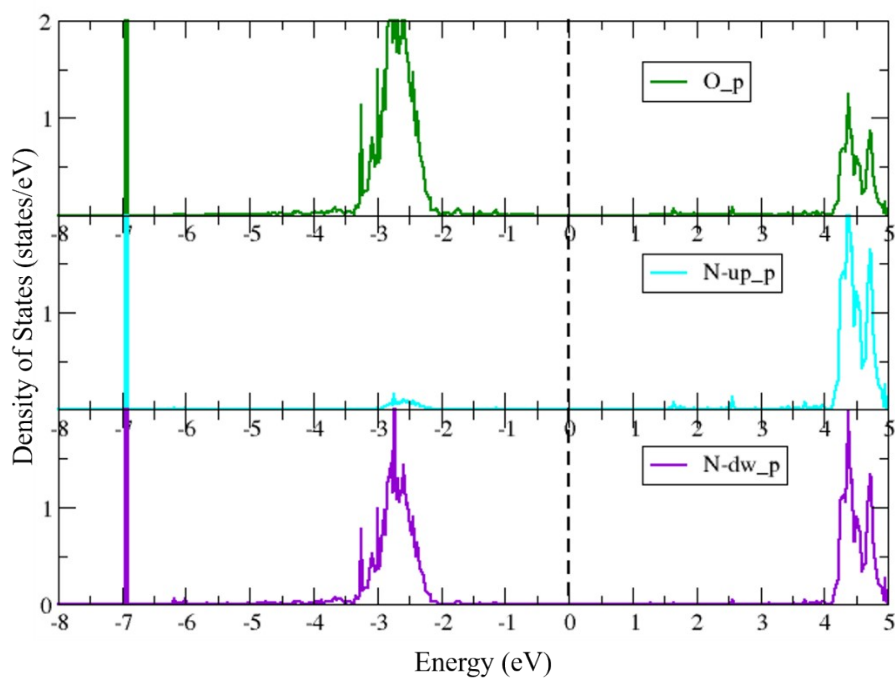

Figure S3, Projected Density of States for  $\text{N}_2\text{O}$  molecule adsorbed on  $\text{Ti}_{5c}$  site with N down configuration on  $\text{TiO}_2$  Rutile (110) surface.

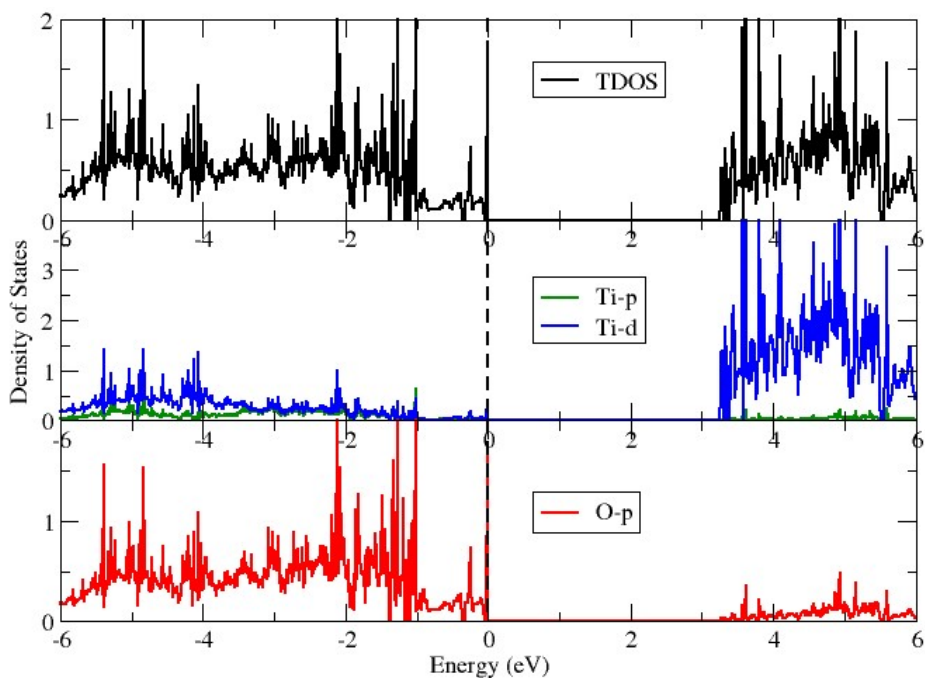

Figure S4, Projected density of states for pure Rutile  $\text{TiO}_2$  (110) surface calculated by Hybrid density functional theory (HSE06) calculations with the bandgap of about 3.2 eV. Since the experimental bandgap of Rutile  $\text{TiO}_2$  is 3.0 eV, here HSE06 functional slightly overestimated the bandgap. Most of the states are from O-2p and Ti-3d orbitals for valence and conduction bands, respectively.

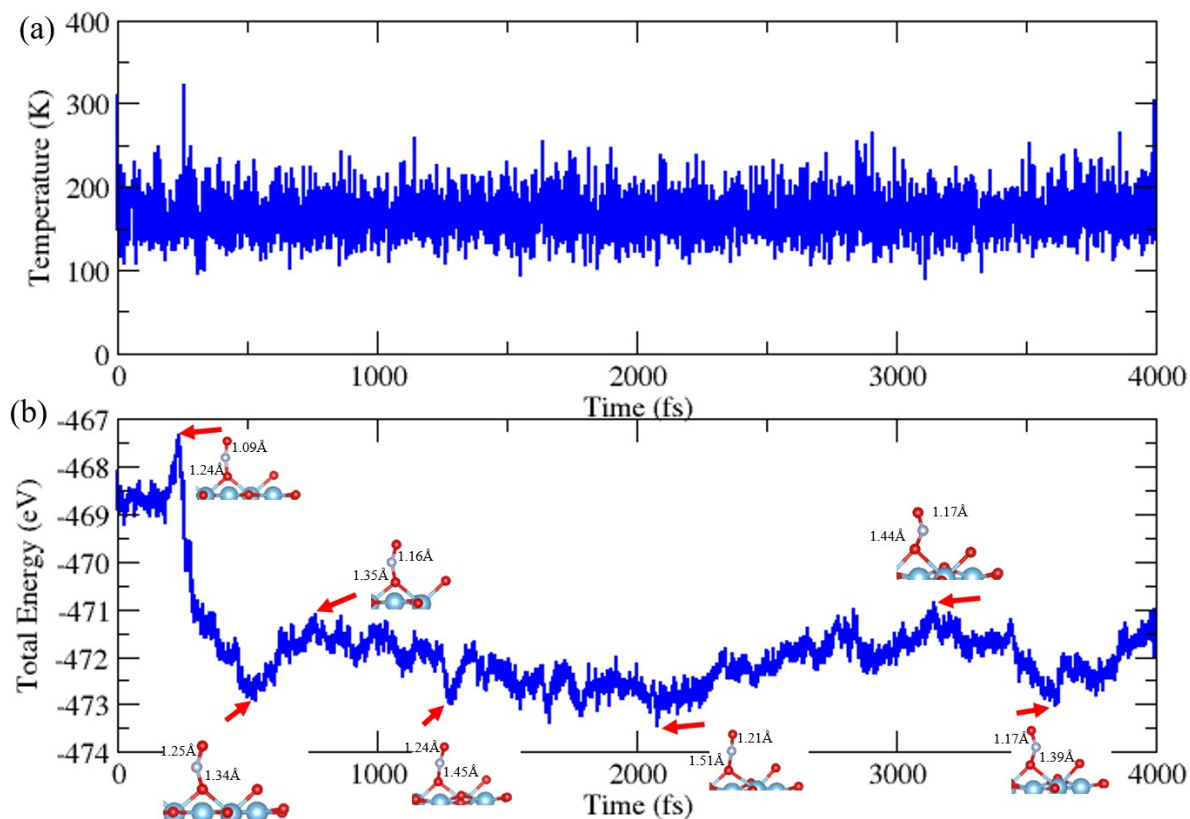

Figure S5, AIMD simulation for NO adsorbed  $\text{TiO}_2$ . The bond length of the NO molecule and its distance from the surface is higher in lower total energy, and it is lower in higher total energy.
